# Supplementary material
Source: publisher figshare collection journal article supplement (https://acs.figshare.com/ndownloader/files/4171453)
Supplement: Supplementary file 1 [file 4171453]

# Ultrasensitive chemical detection using a nanocoax sensor

Huaizhou Zhao<sup>‡,§</sup>, Binod Rizal<sup>‡</sup>, Gregory McMahon<sup>‡</sup>, Hengzhi Wang<sup>‡</sup>, Pashupati Dhakal<sup>‡</sup>, Timothy Kirkpatrick<sup>‡</sup>, Zhifeng Ren<sup>‡</sup>, Thomas C. Chiles<sup>§</sup>, Michael J. Naughton<sup>‡,\*</sup> and Dong Cai<sup>§\*</sup>

<sup>‡</sup>Department of Physics, <sup>§</sup>Department of Biology  
Boston College, Chestnut Hill, Massachusetts 02467, U.S.A

\*Correspondence should be addressed: naughton@bc.edu; caid@bc.edu

## Supporting Information

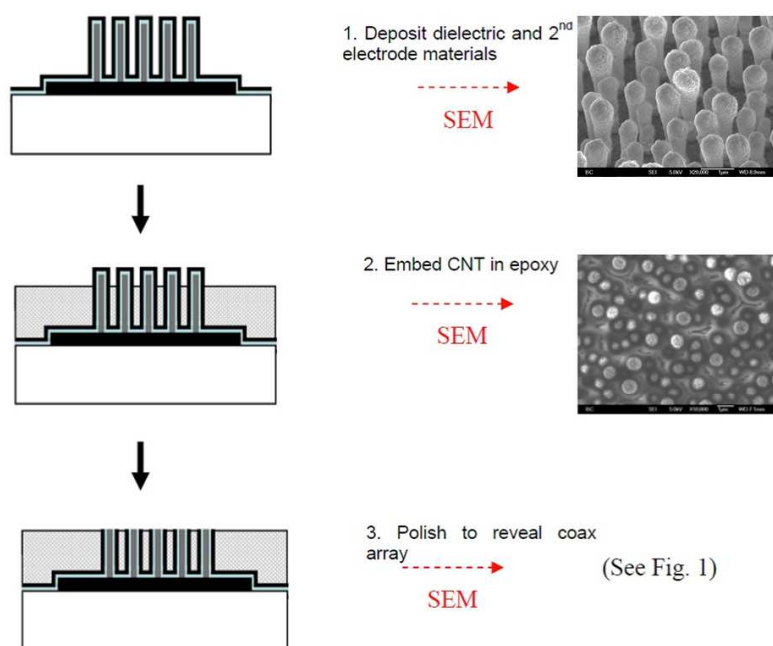

**Scheme 1S.** Fabrication of nanocoaxial cavity array.

**Figure S1(a).** Fabrication scheme

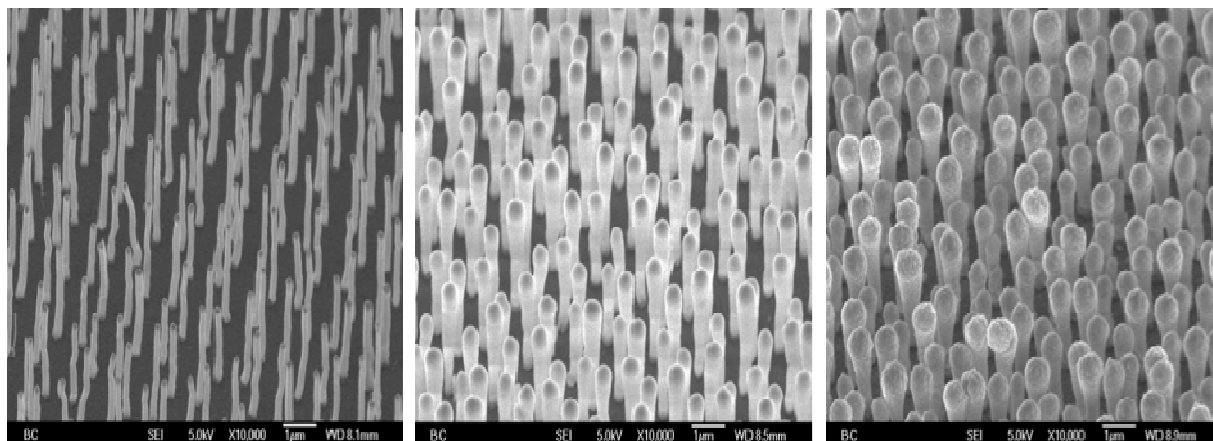

CNTs

+ 10 nm ALD  $\text{Al}_2\text{O}_3$  and  
150 nm sputtered  $\text{Al}_2\text{O}_3$

+ 250 nm Al outer layer

**Figure S1(b).** SEM images for each step of fabrication process

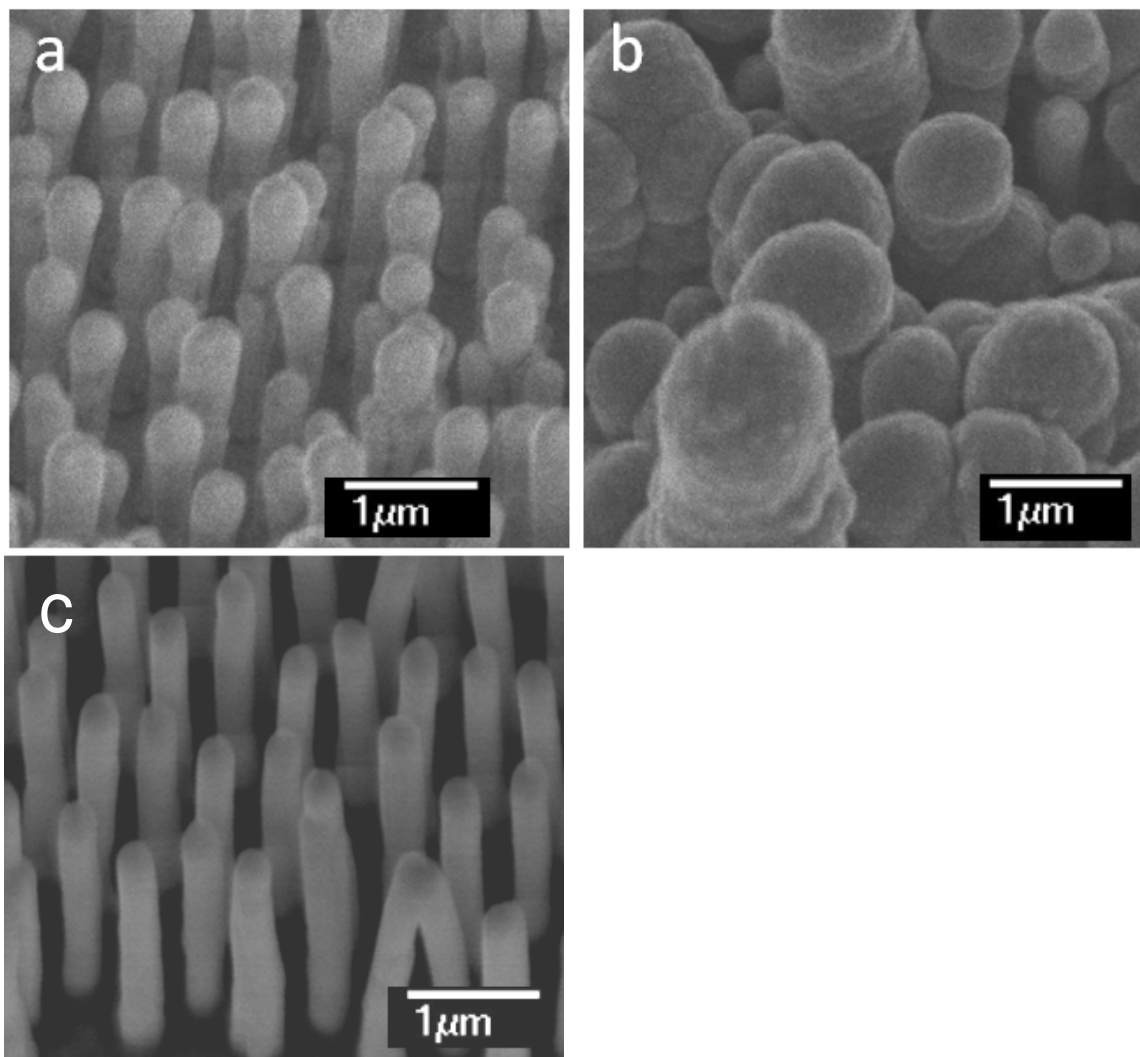

**Figure S2.** Electropolymerization of PPy on Al<sub>2</sub>O<sub>3</sub>-coated CNT arrays. For Al<sub>2</sub>O<sub>3</sub> from sputter deposition, (a) and (b) correspond to the SEM images before and after PPy electropolymerization, respectively. No apparent PPy deposition was shown on the ALD Al<sub>2</sub>O<sub>3</sub> (80 nm) coated CNT array (c).

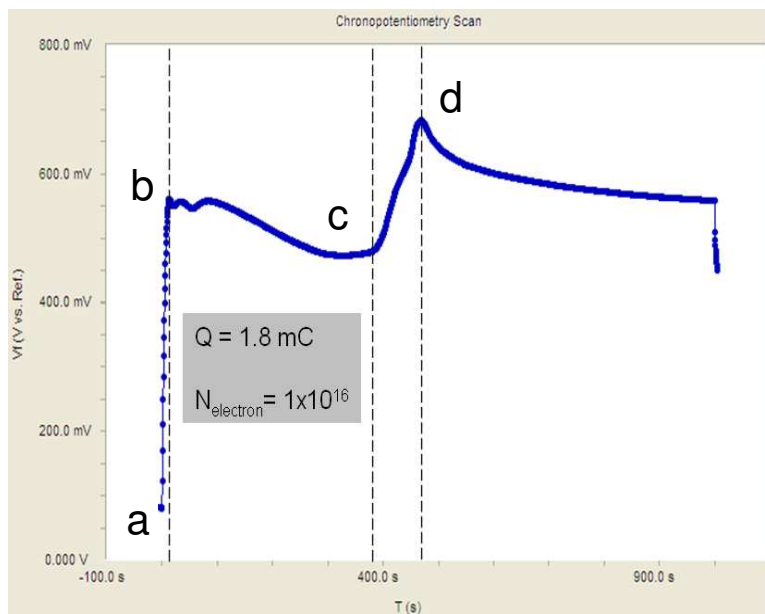

**Figure S3.** The phases of galvanostatic deposition of PPy in porous Al<sub>2</sub>O<sub>3</sub> thin film. a-b: PPy nucleated at the pore bottom of Al<sub>2</sub>O<sub>3</sub>; b-c: PPy grew inside the pores; c-d: the transition phase; d: PPy deposited outside the Al<sub>2</sub>O<sub>3</sub> coating.

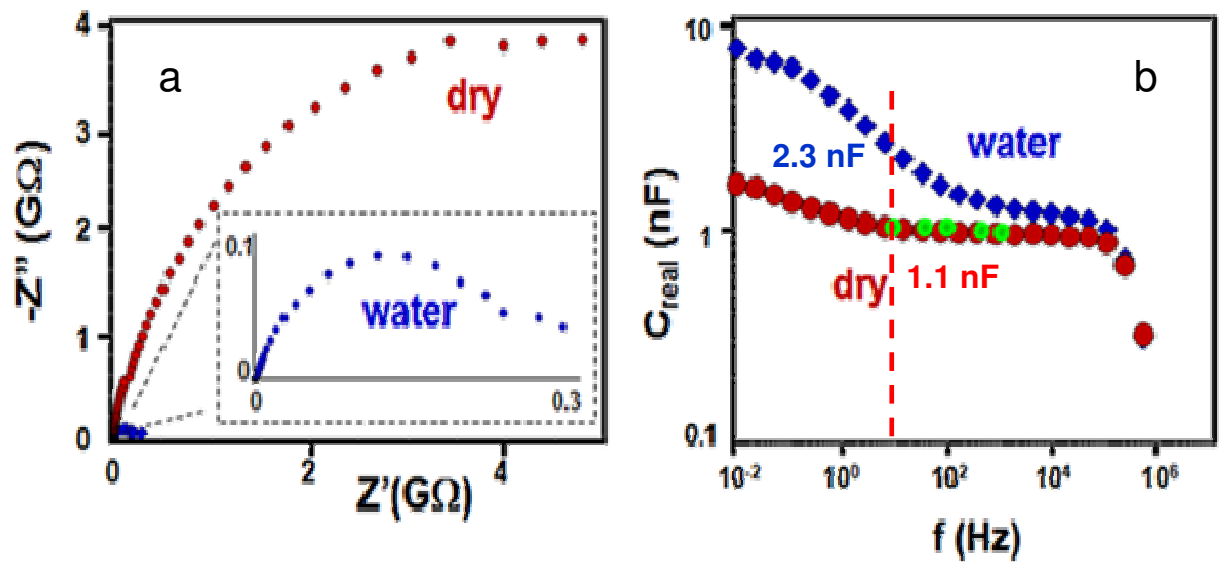

**Figure S4.** Measurement of sensor capacitance with impedance spectroscopy. a: Nyquist plots of impedance spectroscopy from 10 mHz to 1 MHz for dry (red) and water-immersed (blue) sensor. b: Capacitance extracted from data shown in a. Green symbols refer to the capacitance measurement by lock-in amplifier, showing consistency with that extracted from spectroscopy.

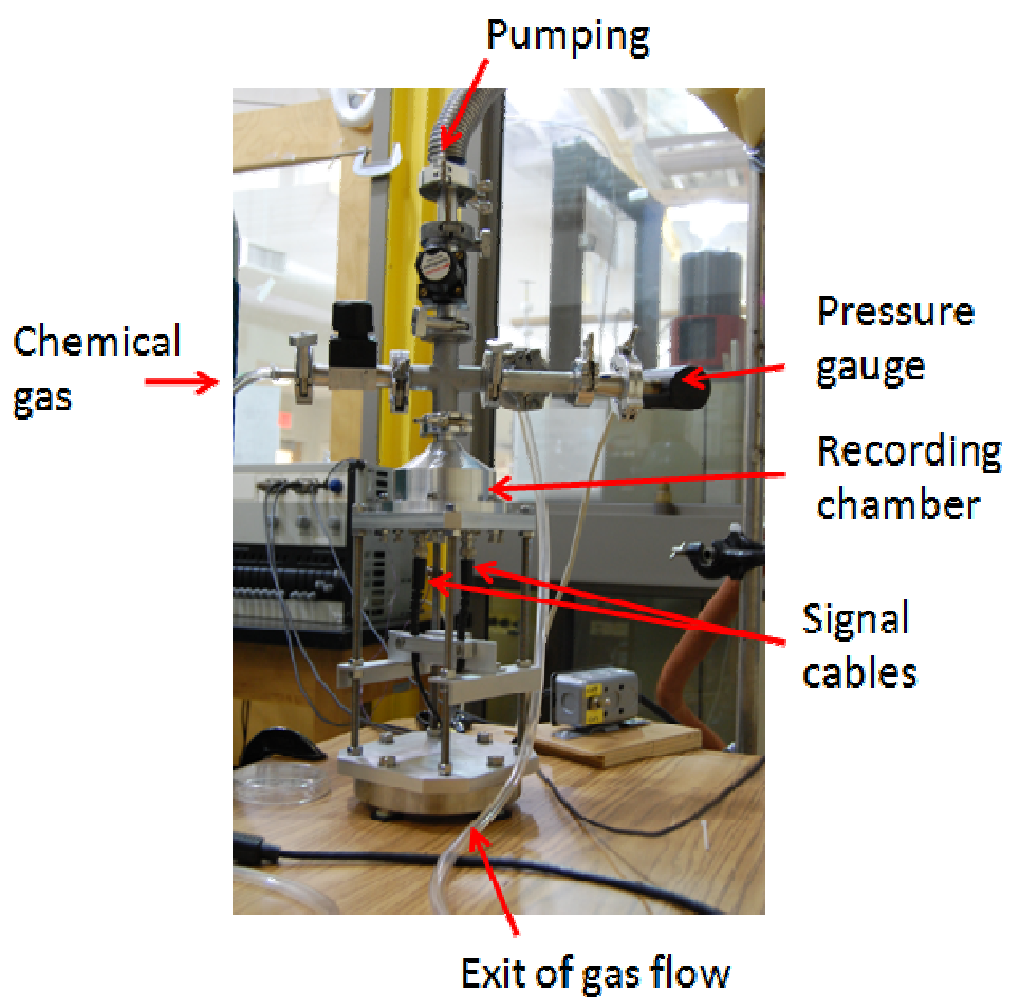

**Figure S5.** The measurement chamber.

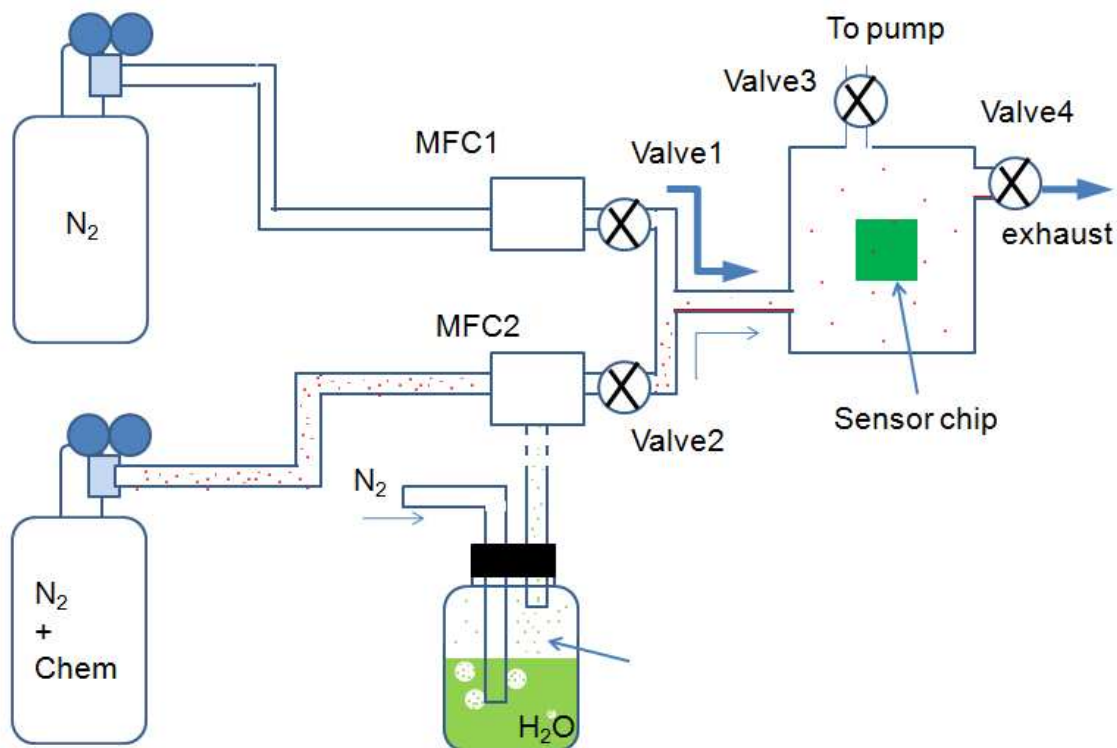

**Scheme S6.** The gas dilution system.

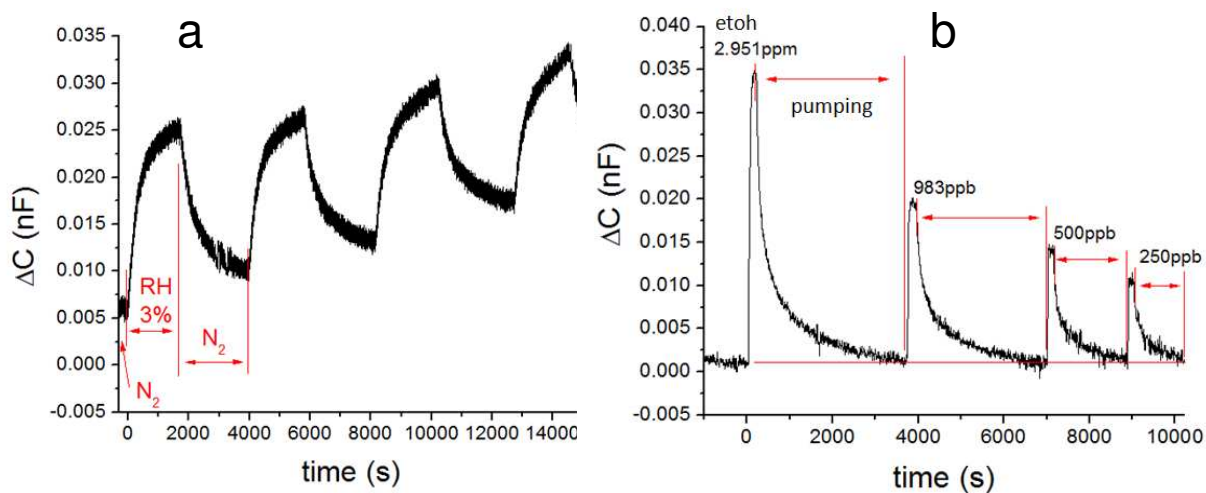

**Figure S7.** Sensor response to  $RH$  and ethanol. a: Sensor was treated with humidified  $N_2$  gas at  $RH=3\%$  and flushed with  $N_2$  gas four times. b: Response to a series of ethanol concentrations. The ethanol vapor carried by  $N_2$  gas is applied to the sensor after evacuation with pumping. The recovery (desorption) takes tens of times longer than the rising (adsorption) phase.



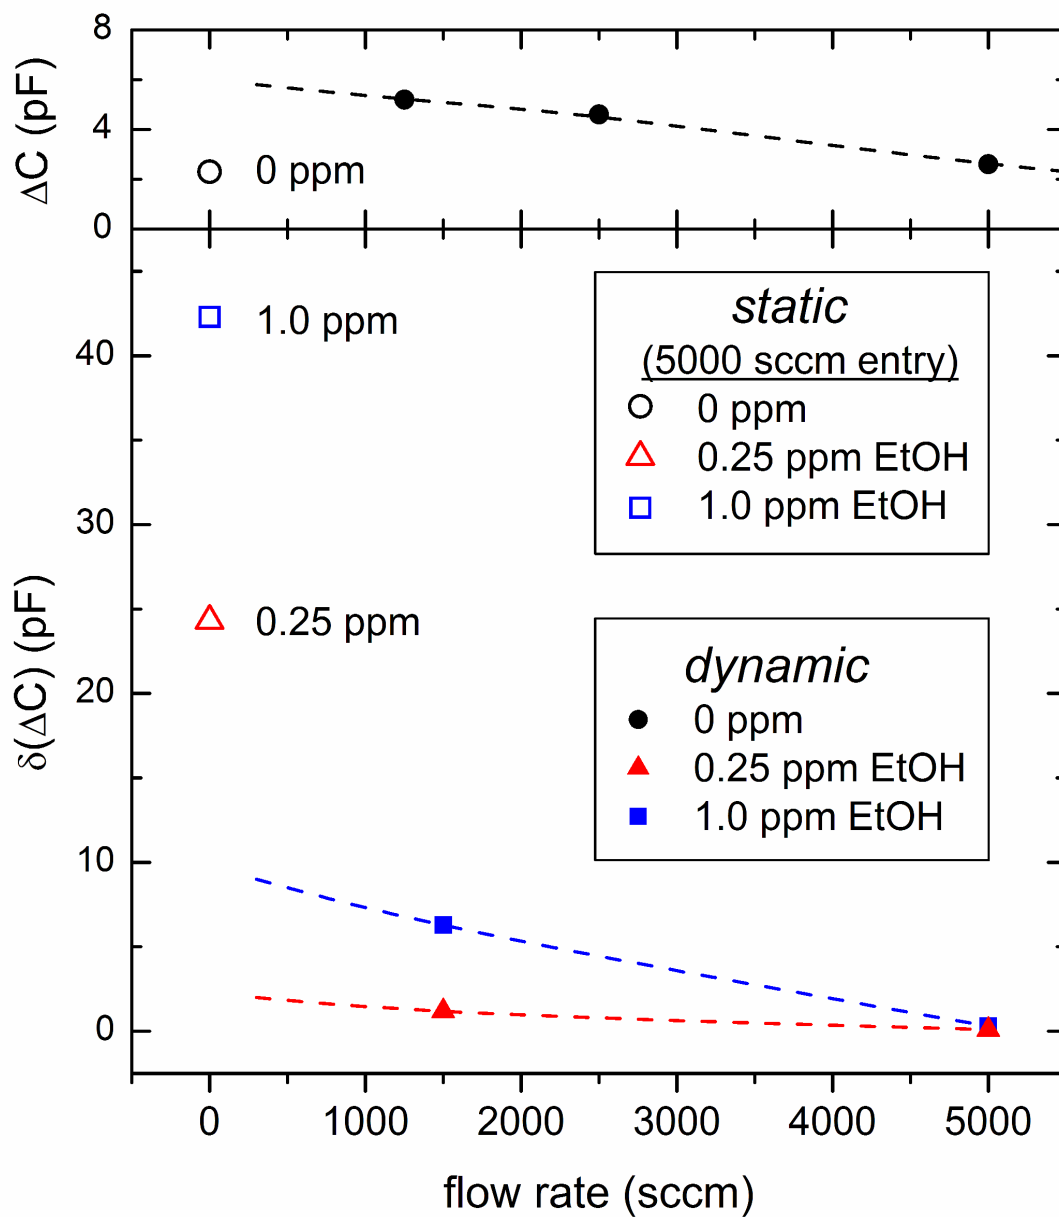

**Figure S8.** Flow rate dependence of sensitivity for pure nitrogen and ethanol at 0.25 ppm and 1.0 ppm concentrations in  $N_2$ , under dynamic and static measurement conditions, showing considerably higher sensitivity for the latter.
